# Supplementary material for: ANI-1, A data set of 20 million calculated off-equilibrium conformations for organic molecules
Source: PubMed Central journal article supplement (PMC5735918; doi:10.1038/sdata.2017.193), 2017-12-19
Supplement: sdata2017193-s2.pdf [file sdata2017193-s2.pdf]

**Supplementary information for: “ANI-1, A data set of 20 million calculated off-equilibrium conformations for organic molecules”**

Justin S. Smith<sup>1</sup>, Olexandr Isayev<sup>2,\*</sup>, Adrian E. Roitberg<sup>1,\*</sup>

<sup>1</sup>*Department of Chemistry, University of Florida, Gainesville, FL 32611, USA*

<sup>2</sup>*UNC Eshelman School of Pharmacy, University of North Carolina at Chapel Hill, Chapel Hill, NC 27599, USA*

\* Corresponding authors; email: O.I. (olexandr@olexandrisayev.com) or A.E.R. (roitberg@ufl.edu)

| <b>Atomic Species</b> | <b>Self-interaction energy</b> |
|-----------------------|--------------------------------|
| H                     | -0.500607632585                |
| C                     | -37.8302333826                 |
| N                     | -54.5680045287                 |
| O                     | -75.0362229210                 |

*Table S1: Self-interaction energies of atoms. Calculated with the  $\omega$ B97x functional with the 6-31G(d) basis set. Each atom is treated with the proper spin state for the neutral species.*

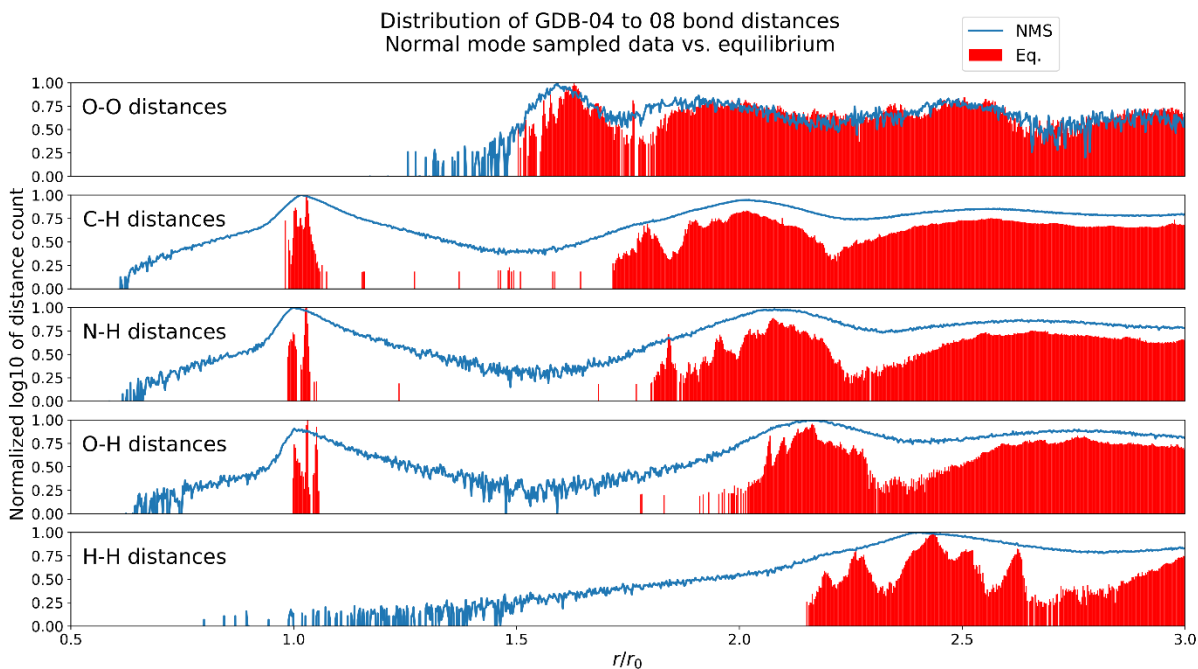

**Figure S1:** Distribution of atomic distances in the subset of the data set constructed from the molecules containing between 4 and 8 heavy atoms (GDB-04 to 08) of C, N, and O. The y-axis is the base 10 logarithm of the count of distances in each bin, normalized over the full domain so that the two sets can be compared. The x-axis represents the atomic distance ( $r$ ) divided by the single bond equilibrium distance ( $r_0$ ) for the smallest possible molecule containing a single bond of the type shown, as calculated using the  $\omega$ B97x density functional with the 6-31g(d) basis set. The red histogram shows the full distribution of distances for a data set containing only equilibrium distances. The blue line shows the distribution of our non-equilibrium data set, with distances randomly sub sampled at a rate of 1%. As the figure shows, even 1% of the the non-equilibrium data set covers vast areas of atomic distance space where the equilibrium data set fails to sample.

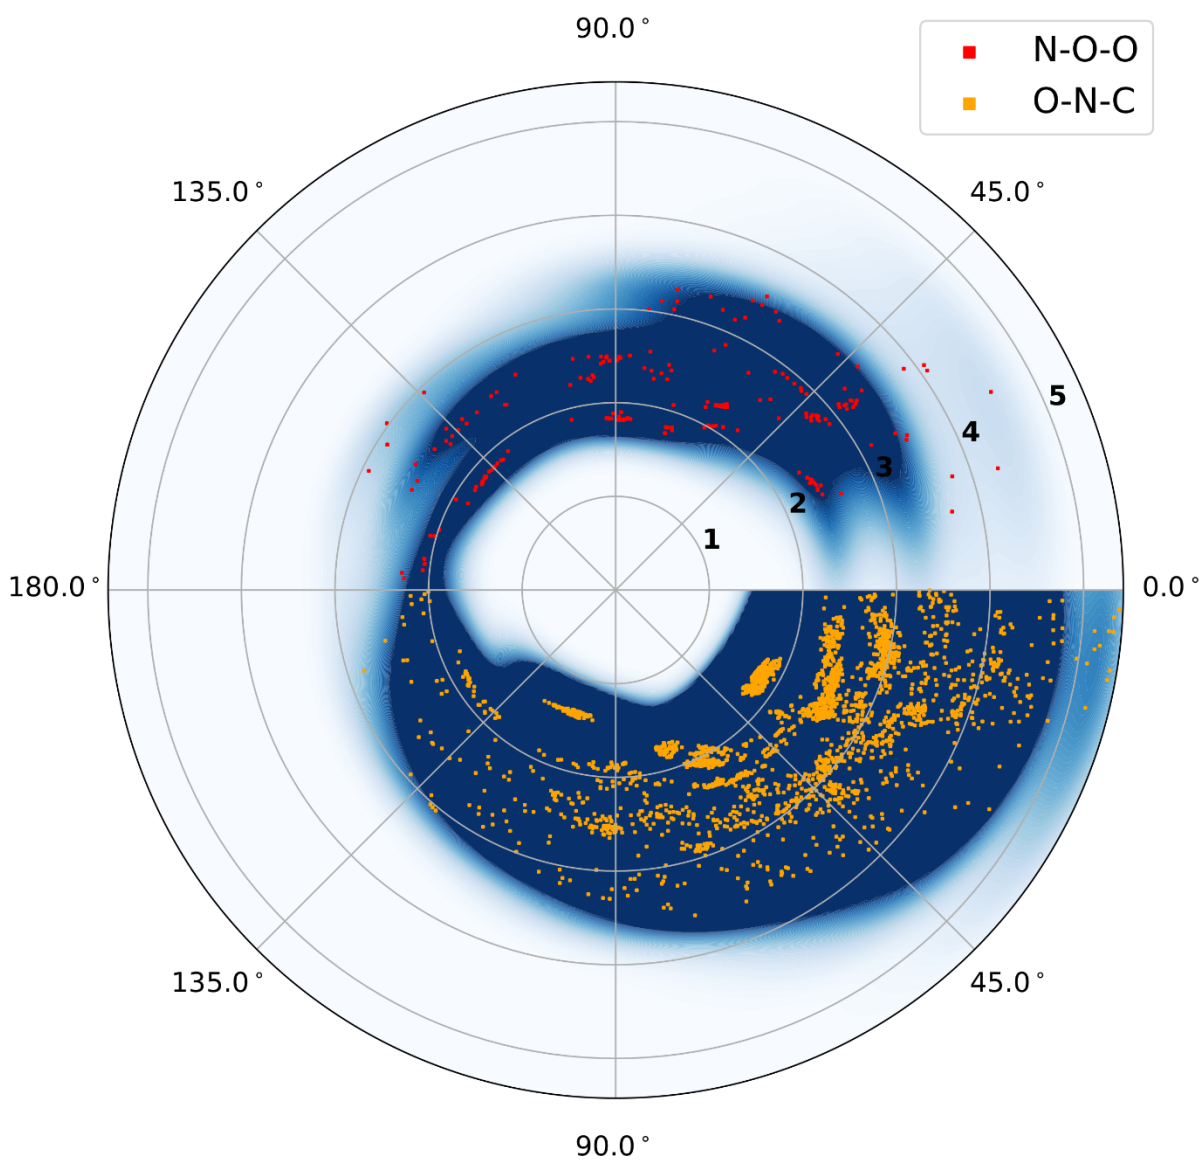

**Figure S2:** Distribution of angles centered on carbon atoms and average distances between the other atoms and the carbon center. Red: N-O-O and orange: O-N-C atom triples for the equilibrium data set of 6-heavy atom molecules. The blue density plot in the background is from the 6-heavy atom non-equilibrium data set subsampled at 10% of all angles in the data set and saturated at 10% density.

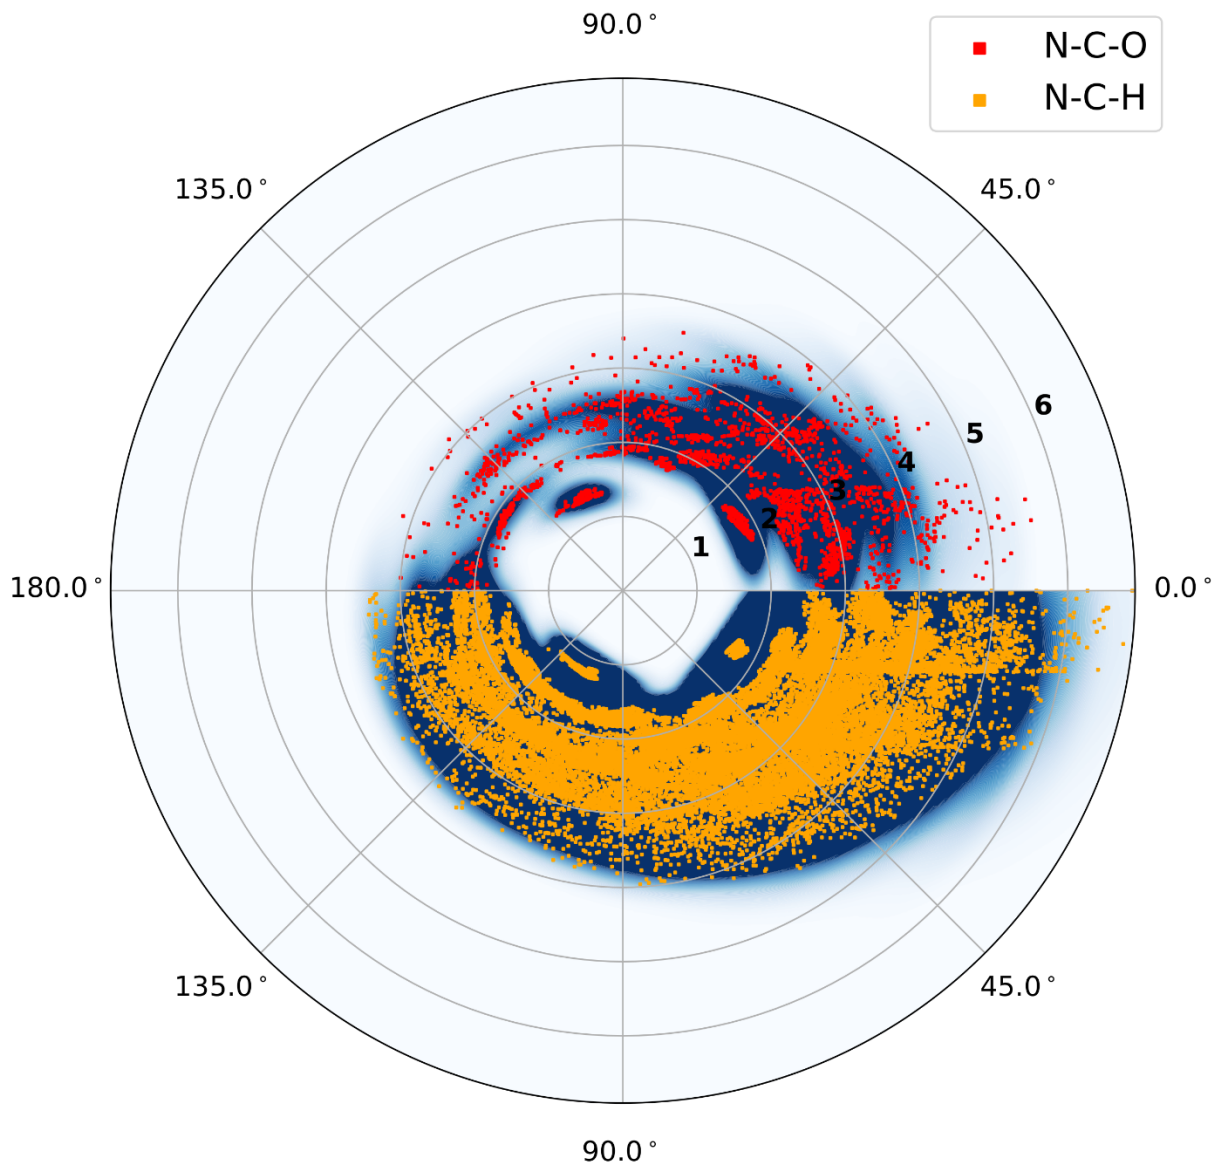

**Figure S3:** Distribution of angles centered on carbon atoms and average distances between the other atoms and the carbon center. Red: N-C-O and orange: N-C-H atom triples for the equilibrium data set of 6-heavy atom molecules. The blue density plot in the background is from the 6-heavy atom non-equilibrium data set subsampled at 10% of all angles in the data set and saturated at 10% density.

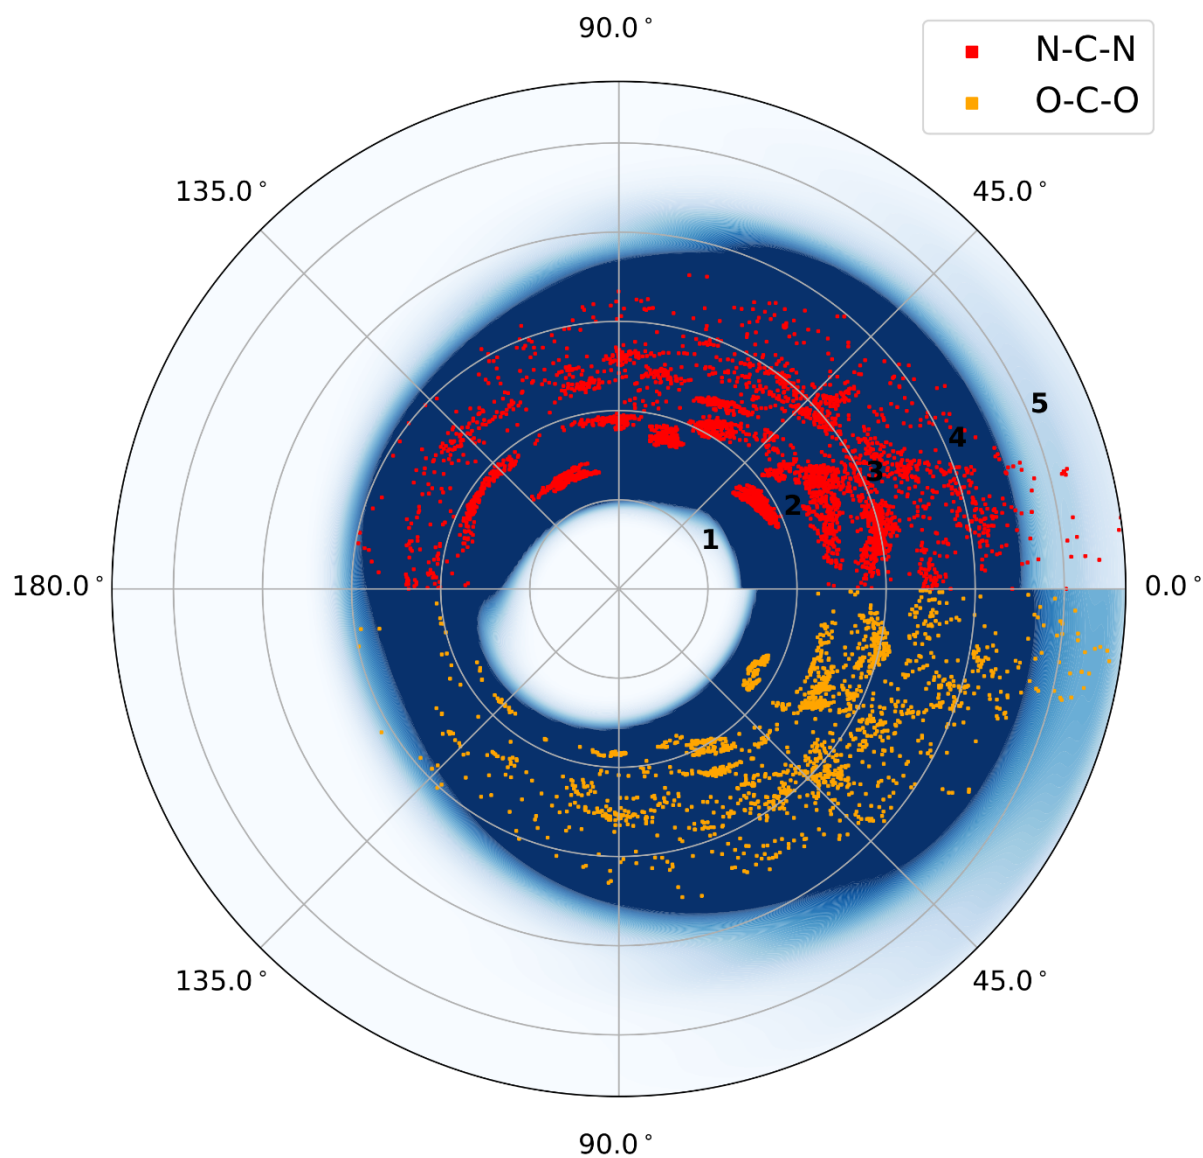

**Figure S4:** Distribution of angles centered on carbon atoms and average distances between the other atoms and the carbon center. Red: N-C-N and orange: O-C-O atom triples for the equilibrium data set of 6-heavy atom molecules. The blue density plot in the background is from the 6-heavy atom non-equilibrium data set subsampled at 10% of all angles in the data set and saturated at 10% density.
